# Supplementary material for: Bacterial cell surface nanoenvironment requires a specialized chaperone to activate a peptidoglycan biosynthetic enzyme
Source: PubMed Central journal article supplement (PMC10659427; doi:10.1101/2023.10.06.561273), 2023-10-06
Supplement: NIHPP2023.10.06.561273V1-supplement-1.pdf [file NIHPP2023.10.06.561273V1-supplement-1.pdf]

830 **SUPPORTING INFORMATION**

831 **Table S1. Cortex peptidoglycan analysis of WT and  $\Delta spoVK$  strains.** Extracted  
832 peptidoglycan from developing forespores of the wild type and  $\Delta spoVK$  strains harvested 5 h  
833 after the onset of sporulation was digested with mutanolysin and separated using HPLC.  
834 Muropeptides were identified based on previous studies of elution times<sup>1,2</sup>. Peaks were then  
835 integrated, and peptidoglycan structural parameters were calculated. Errors are S.D.

| PG species                               | WT         | $\Delta spoVK$ |
|------------------------------------------|------------|----------------|
| % muramic acid as lactam                 | 33.3 ± 1.5 | 6.5 ± 3.0      |
| % muramic acid with alanine              | 20.6 ± 0.6 | 19.5 ± 0.9     |
| % muramic acid with tripeptide           | 15.9 ± 1.9 | 42.9 ± 3.7     |
| % muramic acid with tetrapeptide         | 30.2 ± 0.4 | 31.2 ± 1.4     |
| % muramic acid with pentapeptide         | 0.0 ± 0.0  | 0.0 ± 0.0      |
| % peptide as tetrapeptide                | 65.6 ± 3.0 | 42.2 ± 2.5     |
| % peptide as tripeptide                  | 34.4 ± 3.0 | 57.8 ± 2.5     |
| % peptide in crosslinks                  | 19.0 ± 0.6 | 20.4 ± 2.2     |
| % peptide in effective crosslinks        | 19.0 ± 0.6 | 20.4 ± 2.2     |
| % disaccharide units in disaccharides    | 36.4 ± 3.0 | 87.1 ± 6.0     |
| % disaccharide units in tetrasaccharides | 54.7 ± 2.8 | 12.9 ± 6.0     |
| % disaccharide units in hexasaccharides  | 9.0 ± 0.5  | 0.0 ± 0.0      |
| % lactam in regular distribution         | 82.1 ± 0.9 | 100.0 ± 0.0    |
| % disaccharide peptide crosslinked       | 23.8 ± 0.3 | 20.4 ± 2.2     |
| % tetrasaccharide peptide crosslinked    | 5.0 ± 0.2  | 0.0 ± 0.0      |
| % lactam reduced                         | 0.2 ± 0.0  | 0.2 ± 0.0      |
| % tripeptide crosslinked                 | 39.6 ± 0.8 | 31.1 ± 1.7     |
| % tetrapeptide crosslinked               | 8.2 ± 0.5  | 5.7 ± 4.7      |
| % disaccharide per effective crosslink   | 11.5 ± 0.7 | 6.6 ± 0.4      |
| % muramic acid with crosslink            | 8.8 ± 0.5  | 15.1 ± 0.9     |

836

837 <sup>1</sup>DOI: 10.1128/JB.182.16.4491-4499.2000

838 <sup>2</sup>DOI: 10.1128/jb.178.22.6451-6458.1996

839

840 **Table S2. Bacterial Strains.**

| <i>Bacillus subtilis</i> strains used in this study |                                                                                                                                  |                             |
|-----------------------------------------------------|----------------------------------------------------------------------------------------------------------------------------------|-----------------------------|
| Strain                                              | Genotype or description                                                                                                          | Reference                   |
| PY79                                                | Prototrophic derivative of <i>B. subtilis</i> 168                                                                                | Youngman et al., 1984       |
| KP73                                                | $\Delta spoIVA::neo$                                                                                                             | Price and Losick, 1999      |
| KR160                                               | <i>thrC::gfp-spoIVA spec</i>                                                                                                     | Ramamurthi and Losick, 2008 |
| TD549                                               | $\Delta spoVK::erm thrC::gfp-spoIVA spec$                                                                                        | This study                  |
| TD520                                               | $\Delta spoVK::erm$                                                                                                              | This study                  |
| TD513                                               | $\Delta spoVK::erm amyE::spoVK cat$                                                                                              | This study                  |
| TD514                                               | $\Delta spoVK::erm amyE::spoVK^{A5V} cat$                                                                                        | This study                  |
| JPC221                                              | $\Delta spoIVA::neo thrC::spoIVA^{T70A,T71A} spec$                                                                               | Castaing et al., 2013       |
| TD524                                               | $\Delta spoIVA::neo thrC:: spoIVA^{T70A,T71A} spec \Delta spoVK::erm$                                                            | This study                  |
| TD530                                               | $\Delta spoIVA::neo thrC:: spoIVA^{T70A,T71A} spec \Delta spoVK::erm amyE::spoVK cat$                                            | This study                  |
| TD531                                               | $\Delta spoIVA::neo thrC:: spoIVA^{T70A,T71A} spec \Delta spoVK::erm amyE::spoVK^{A5V} cat$                                      | This study                  |
| TD523                                               | $\Delta spoIVA::neo thrC::spoIVA^{D97A} spec \Delta spoVK::erm$                                                                  | This study                  |
| TD528                                               | $\Delta spoIVA::neo thrC::spoIVA^{D97A} spec \Delta spoVK::erm amyE::spoVK cat$                                                  | This study                  |
| TD529                                               | $\Delta spoIVA::neo thrC::spoIVA^{D97A} spec \Delta spoVK::erm amyE::spoVK^{A5V} cat$                                            | This study                  |
| KR438                                               | $\Delta spoIVA::neo thrC::spoIVA^{K30E} spec$                                                                                    | Ramamurthi and Losick, 2008 |
| TD817                                               | $\Delta spoIVA::neo thrC::spoIVA^{K30E} spec \Delta spoVK::erm$                                                                  | This study                  |
| TD818                                               | $\Delta spoIVA::neo thrC::spoIVA^{K30E} spec \Delta spoVK::erm amyE::spoVK cat$                                                  | This study                  |
| TD819                                               | $\Delta spoIVA::neo thrC::spoIVA^{K30E} spec \Delta spoVK::erm amyE::spoVK^{A5V} cat$                                            | This study                  |
| TD845                                               | $\Delta spoIVA::neo amyE::spoIVA^{D97A} cat thrC::GFP-spoIVA^{D97A} spec \Delta spoVK::erm pyrD::spoVK cat::tet$                 | This study                  |
| TD846                                               | $\Delta spoIVA::neo amyE::spoIVA^{T70A,T71A} cat thrC::GFP-spoIVA^{T70A,T71A} spec \Delta spoVK::erm pyrD::spoVK cat::tet$       | This study                  |
| TD854                                               | $\Delta spoIVA::neo amyE::spoIVA^{K30E} cat thrC::GFP-spoIVA^{K30E} spec \Delta spoVK::erm pyrD::spoVK cat::tet$                 | This study                  |
| TD848                                               | $\Delta spoIVA::neo amyE::spoIVA^{D97A} cat thrC::GFP-spoIVA^{D97A} spec \Delta spoVK::erm pyrD::spoVK^{A5V} cat::tet$           | This study                  |
| TD849                                               | $\Delta spoIVA::neo amyE::spoIVA^{T70A,T71A} cat thrC::GFP-spoIVA^{T70A,T71A} spec \Delta spoVK::erm pyrD::spoVK^{A5V} cat::tet$ | This study                  |
| TD855                                               | $\Delta spoIVA::neo amyE::spoIVA^{K30E} cat thrC::GFP-spoIVA^{K30E} spec \Delta spoVK::erm pyrD::spoVK^{A5V} cat::tet$           | This study                  |
| JB103                                               | $\Delta spoIVA::neo thrC::spoIVA^{D97A} spec$                                                                                    | This study                  |
| TD604                                               | <i>amyE::spoVK-linker-GFP cat</i>                                                                                                | This study                  |
| TD652                                               | $\Delta spoIVA::neo amyE::spoVK-linker-GFP cat$                                                                                  | This study                  |
| TD675                                               | $\Delta spoVK::erm amyE::spoVK cat pyrD::spoVK-linker-GFP cat::tet$                                                              | This study                  |
| TD682                                               | $\Delta spoIVA::neo thrC::spoIVA^{D97A} \Delta spoVK::erm amyE::spoVK cat pyrD::spoVK-linker-GFP cat::tet$                       | This study                  |
| TD684                                               | $\Delta spoIVA::neo thrC::spoIVA^{T70A,T71A} \Delta spoVK::erm amyE::spoVK cat pyrD::spoVK-linker-GFP cat::tet$                  | This study                  |

|        |                                                                                                                                             |                         |
|--------|---------------------------------------------------------------------------------------------------------------------------------------------|-------------------------|
| TD836  | $\Delta spoIVA::neo thrC::spoIVA^{K30E} \Delta spoVK::erm amyE::spoVK cat pyrD::spoVK-linker-GFP cat::tet$                                  | This study              |
| TD557  | $\Delta spoIVA::neo thrC::spoIVA^{D97A} spec amyE::spoVK cat$                                                                               | This study              |
| TD558  | $\Delta spoIVA::neo thrC::spoIVA^{D97A} spec amyE::spoVK^{A5V} cat$                                                                         | This study              |
| TD563  | $\Delta spoIVA::neo thrC::spoIVA^{T70A,T71A} spec amyE::spoVK cat$                                                                          | This study              |
| TD564  | $\Delta spoIVA::neo thrC::spoIVA^{T70A,T71A} spec amyE::spoVK^{A5V} cat$                                                                    | This study              |
| TD859  | $\Delta spoIVA::neo thrC::spoIVA^{K30E} spec amyE::spoVK cat$                                                                               | This study              |
| TD860  | $\Delta spoIVA::neo thrC::spoIVA^{K30E} spec amyE::spoVK^{A5V} cat$                                                                         | This study              |
| TD574  | $\Delta spoVK::erm amyE::spoVK^{\Delta 2-42} cat$                                                                                           | This study              |
| TD575  | $\Delta spoVK::erm amyE::spoVK^{K105A,T106A} cat$                                                                                           | This study              |
| TD576  | $\Delta spoVK::erm amyE::spoVK^{D162A,E163A} cat$                                                                                           | This study              |
| TD578  | $\Delta spoVK::erm amyE::spoVK^{R218A,R276A} cat$                                                                                           | This study              |
| TD597  | $amyE::spoVK cat$                                                                                                                           | This study              |
| TD598  | $amyE::spoVK^{\Delta 2-42} cat$                                                                                                             | This study              |
| TD599  | $amyE::spoVK^{K105A,T106A} cat$                                                                                                             | This study              |
| TD600  | $amyE::spoVK^{D162A,E163A} cat$                                                                                                             | This study              |
| TD602  | $amyE::spoVK^{R218A,R276A} cat$                                                                                                             | This study              |
| TD883  | $amyE::P_{spoVID}-spoVK^{D162A,E163A}-His_6 cat$                                                                                            | This study              |
| TD884  | $amyE::P_{spoVID}-spoVK^{D162A,E163A}-FLAG cat$                                                                                             | This study              |
| TD1193 | $amyE::P_{spoVID}-spoVK^{A5V,D162A,E163A}-FLAG cat$                                                                                         | This study              |
| TD651  | $\Delta spoVID::neo amyE::spoVK-linker-GFP cat$                                                                                             | This study              |
| TD695  | $\Delta spoVID::neo amyE::spoVID^{T532G} cat pyrD::spoVK-linker-GFP cat::tet$                                                               | This study              |
| TD1257 | $\Delta spoIVA::erm \Delta spoVID::neo thrC::spoIVA spec amyE::spoVID^{501-575} pyrD::spoVK-linker-GFP cat::tet$                            | This study              |
| KR394  | $\Delta spoIVA::neo thrC::spoIVA spec$                                                                                                      | Ramamurthi et al., 2006 |
| JB171  | $\Delta spoIVA::erm \Delta spoVID::neo thrC::spoIVA spec$                                                                                   | This study              |
| JB174  | $\Delta spoIVA::erm \Delta spoVID::neo thrC::spoIVA spec amyE::spoVID cat$                                                                  | This study              |
| TD892  | $\Delta spoIVA::erm \Delta spoVID::neo thrC::spoIVA spec amyE::spoVID^{501-575}$                                                            | This study              |
| TD893  | $\Delta spoIVA::erm \Delta spoVID::neo thrC::spoIVA spec amyE::spoVID^{526-575}$                                                            | This study              |
| TD1268 | $\Delta spoIVA::erm \Delta spoVID::neo thrC::spoIVA spec amyE::P_{spoVID}-spoVK^{D162A-E163A}-FLAG cat$                                     | This study              |
| TD1281 | $\Delta spoIVA::erm \Delta spoVID::neo thrC::spoIVA spec amyE::P_{spoVID}-spoVK^{D162A-E163A}-FLAG cat sacA::GFP-spoVID^{501-575} cat::tet$ | This study              |
| TD1267 | $\Delta spoIVA::neo thrC::spoIVA spec amyE::P_{spoVID}-spoVK^{D162A-E163A}-FLAG cat$                                                        | This study              |
| TD1277 | $\Delta spoIVA::neo thrC::spoIVA spec amyE::P_{spoVID}-spoVK^{D162A-E163A,\Delta 2-6}-FLAG cat$                                             | This study              |
| TD1283 | $\Delta spoIVA::neo thrC::spoIVA spec amyE::P_{spoVID}-spoVK^{D162A-E163A,A5V}-FLAG cat$                                                    | This study              |
| TD1278 | $\Delta spoIVA::erm \Delta spoVID::neo thrC::spoIVA spec amyE::P_{spoVID}-spoVK^{D162A-E163A,\Delta 2-6}-FLAG cat$                          | This study              |
| TD1284 | $\Delta spoIVA::erm \Delta spoVID::neo thrC::spoIVA spec amyE::P_{spoVID}-spoVK^{D162A-E163A,A5V}-FLAG cat$                                 | This study              |
| SC765  | $amyE::P_{spoVM}-SpoVM-lphluorin-cat$                                                                                                       | This study              |
| SC766  | $amyE::P_{spollQ}-lphluorin-cat$                                                                                                            | This study              |
| SC767  | $amyE::P_{spoVM}-lphluorin-cat$                                                                                                             | This study              |
| SC777  | $thrC::P_{hyperspank}-lphluorin-erm$                                                                                                        | This study              |

*Escherichia coli* strains used in this study

| Strain    | Genotype and description                                                                                    | Reference  |
|-----------|-------------------------------------------------------------------------------------------------------------|------------|
| BL21(DE3) | <i>pTD211</i> ( <i>pET28a</i> backbone, <i>P<sub>T7</sub>-spoVK-His<sub>6</sub></i> )                       | This study |
| BL21(DE3) | <i>pTD308</i> ( <i>pET28a</i> backbone, <i>P<sub>T7</sub>-spoVK<sup>D162A,E163A</sup>-His<sub>6</sub></i> ) | This study |

841

842

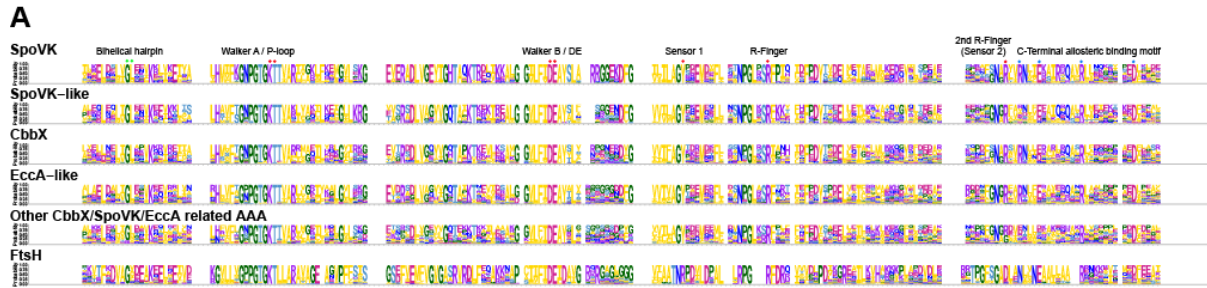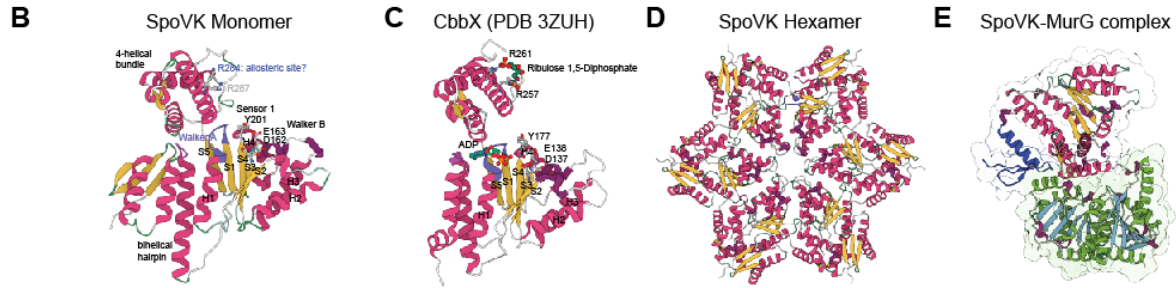

**Figure S1. Sequence and structural comparison between SpoVK and members of the SpoVK-EccA-like AAA+ ATPase clade.** (A) Sequence logo displaying conservation of amino acid residues in the SpoVK-EccA-like AAA+ ATPase clade. Letters represent amino acid abbreviations; height of each letter represents the probability of conservation among orthologs of the family. The first and second arginine fingers are marked with red dots. Blue dots are conserved residues contacting the allosteric ligand ribulose bisphosphate. (B-E) Cartoon depictions of (B) AlphaFold2 prediction of SpoVK structure, (C) CbbX from *Cereibacter sphaeroides* (PDB 3ZUH), (D) AlphaFold-Multimer prediction of SpoVK hexamer, and (E) AlphaFold-Multimer prediction of SpoVK-MurG complex.

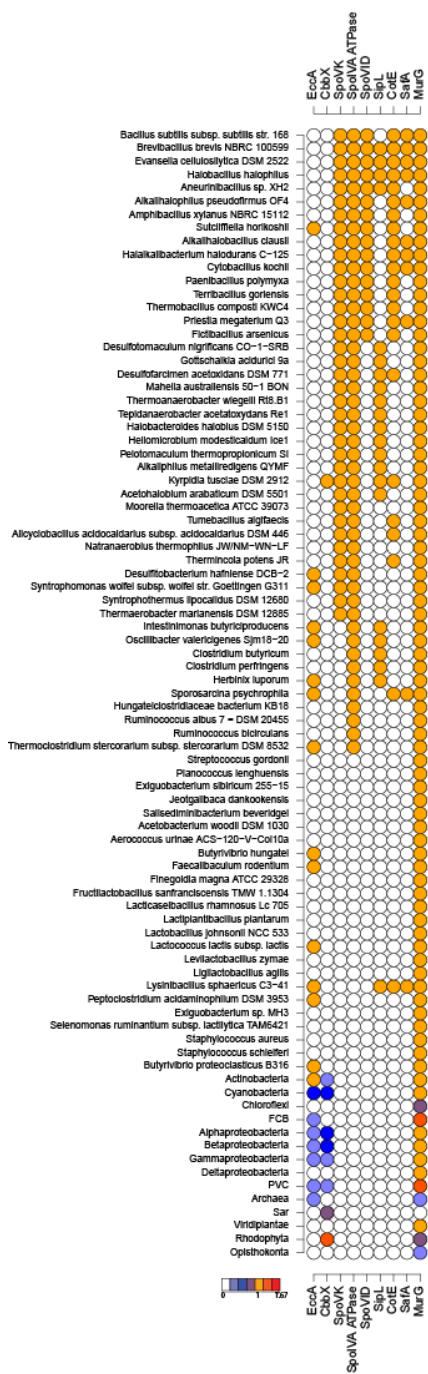

**Figure S2. Phyletic pattern vectors of EccA, CbbX, SpoVK, SpoVA ATPase, SpoVID, SipL, CotE, SafA, and MurG domain proteins.** The presence or absence of the protein in the clade or organism (Firmicutes) are shown. The legend shows the color gradient for normalized counts that were scaled by square root.

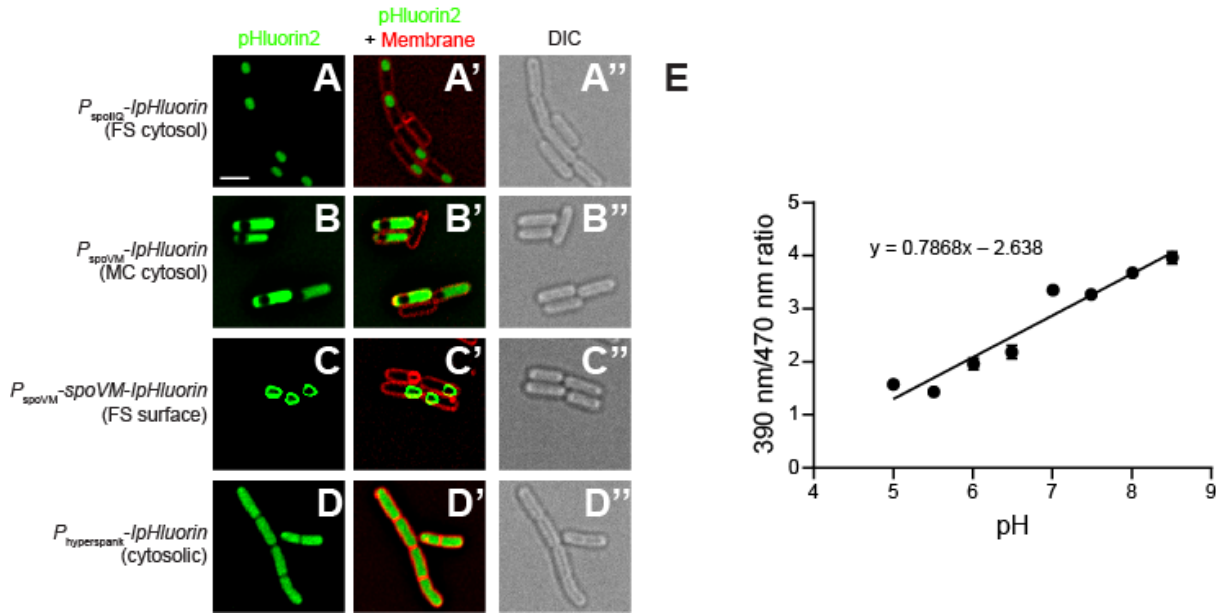

**Figure S3. Subcellular localization of various IpHluorin constructs during sporulation.** Fluorescence micrographs of *B. subtilis* (A-C'') at t = 4 h after induction of sporulation producing (A-A'') IpHluorin in the forespore, expressed under control of the *spoIIQ* promoter, (B-B'') IpHluorin in the mother cell, expressed under control of the *spoVM* promoter, or (C-C'') SpoVM-*IpHluorin* at the forespore surface, expressed in the mother cell under control of the *spoVM* promoter; or (D-D'') during vegetative growth producing IpHluorin, expressed under control of an IPTG-inducible promoter at t = 2 h after IPTG induction. (A-D) fluorescence from IpHluorin; (A'-D') overlay, IpHluorin and membranes visualized using FM4-64; (A''-D'') differential interference contrast. Strains: SC765, SC766, SC767, and SC777. Scale bar: 2  $\mu$ m. (E) Calibration curve of ratio of fluorescence emission at 510 nm when excited at either 390 nm or 470 nm as a function of media pH.

845

846
